# Supplementary material
Source: Copernicus journal article supplement (doi:10.5194/soil-12-441-2026)
Supplement: Supplementary file 1 [file soil-12-441-2026-supplement.pdf]

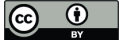

*Supplement of*

## **Proglacial wetlands: an overlooked CO<sub>2</sub> sink within recently deglaciated landscapes**

**Sigrid van Grinsven et al.**

*Correspondence to:* Sigrid van Grinsven ([sigrid.van-grinsven@geo.uni-tuebingen.de](mailto:sigrid.van-grinsven@geo.uni-tuebingen.de))

The copyright of individual parts of the supplement might differ from the article licence.

Table S1. Overview of CO<sub>2</sub> flux data of all locations. When a certain location has no statistically significant (thus linear  $R^2 < 0.7$ ) CO<sub>2</sub> flux measurements, the CO<sub>2</sub> flux is presented as NS. At each location, 4 measurements were done, but only the statistically significant CO<sub>2</sub> fluxes are shown.

| LocationID | Age | Year of deglaciation | CO <sub>2</sub> flux (mg C m <sup>2</sup> hr) | R-squared of linear regression of [CO <sub>2</sub> ] |
|------------|-----|----------------------|-----------------------------------------------|------------------------------------------------------|
| X08        | 1   | 2023                 | -7.1                                          | 0.85                                                 |
| X08        | 1   | 2023                 | -9.0                                          | 0.89                                                 |
| X08        | 1   | 2023                 | 7.6                                           | 0.87                                                 |
| W85        | 6   | 2019                 | 13.3                                          | 0.94                                                 |
| X09        | 6   | 2019                 | -8.9                                          | 0.77                                                 |
| A56        | 8   | 2017                 | 14.7                                          | 0.93                                                 |
| A56        | 8   | 2017                 | 6.0                                           | 0.78                                                 |
| W63        | 8   | 2017                 | 10.1                                          | 0.95                                                 |
| W63        | 8   | 2017                 | -8.6                                          | 0.85                                                 |
| W63        | 8   | 2017                 | -5.5                                          | 0.84                                                 |
| Y63        | 8   | 2017                 | -65.2                                         | 1.00                                                 |
| Y63        | 8   | 2017                 | -21.0                                         | 0.98                                                 |
| Y63        | 8   | 2017                 | -9.4                                          | 0.98                                                 |
| Y63        | 8   | 2017                 | -25.3                                         | 0.99                                                 |
| A60        | 9   | 2016                 | 5.6                                           | 0.81                                                 |
| A60        | 9   | 2016                 | 5.3                                           | 0.71                                                 |
| A60        | 9   | 2016                 | -7.7                                          | 0.87                                                 |
| A64        | 10  | 2015                 | 5.1                                           | 0.89                                                 |
| A64        | 10  | 2015                 | 3.7                                           | 0.80                                                 |
| W83        | 10  | 2015                 | -9.1                                          | 0.85                                                 |
| A35        | 11  | 2014                 | -2.2                                          | 0.74                                                 |
| A35        | 11  | 2014                 | -4.0                                          | 0.76                                                 |
| A46        | 11  | 2014                 | -5.1                                          | 0.90                                                 |
| A46        | 11  | 2014                 | -6.8                                          | 0.97                                                 |
| A46        | 11  | 2014                 | -3.4                                          | 0.76                                                 |
| A48        | 11  | 2014                 | 11.6                                          | 0.82                                                 |
| A48        | 11  | 2014                 | -15.9                                         | 0.74                                                 |

|     |    |      |       |      |
|-----|----|------|-------|------|
| A48 | 11 | 2014 | -3.3  | 0.91 |
| A54 | 13 | 2012 | 6.7   | 0.87 |
| A54 | 13 | 2012 | -9.0  | 0.90 |
| A55 | 13 | 2012 | 9.8   | 0.98 |
| A55 | 13 | 2012 | 5.3   | 0.86 |
| A63 | 13 | 2012 | -5.5  | 0.92 |
| A63 | 13 | 2012 | -3.1  | 0.80 |
| A63 | 13 | 2012 | -2.6  | 0.72 |
| A63 | 13 | 2012 | -8.9  | 0.87 |
| W04 | 13 | 2012 | -8.8  | 0.96 |
| W04 | 13 | 2012 | -4.6  | 0.96 |
| W04 | 13 | 2012 | -17.4 | 0.97 |
| W04 | 13 | 2012 | -16.8 | 0.91 |
| Y19 | 13 | 2012 | -12.8 | 0.98 |
| Y19 | 13 | 2012 | 7.6   | 0.97 |
| Y19 | 13 | 2012 | 3.8   | 0.85 |
| Y19 | 13 | 2012 | -18.1 | 0.96 |
| A45 | 15 | 2010 | 7.0   | 0.79 |
| A45 | 15 | 2010 | -2.8  | 0.80 |
| W60 | 16 | 2009 | -2.7  | 0.70 |
| W60 | 16 | 2009 | -4.6  | 0.92 |
| W60 | 16 | 2009 | -4.7  | 0.88 |
| X04 | 18 | 2007 | 3.4   | 0.83 |
| X04 | 18 | 2007 | 5.6   | 0.86 |
| X04 | 18 | 2007 | 9.0   | 0.87 |
| X10 | 21 | 2004 | -13.4 | 0.97 |
| X10 | 21 | 2004 | -6.4  | 0.73 |
| A31 | 22 | 2003 | -9.8  | 0.95 |
| A36 | 25 | 2000 | 10.3  | 0.73 |
| A36 | 25 | 2000 | -19.9 | 0.93 |
| A36 | 25 | 2000 | -3.9  | 0.72 |
| B15 | 30 | 1995 | -9.2  | 0.71 |
| B15 | 30 | 1995 | -12.5 | 0.81 |
| W07 | 42 | 1983 | -16.9 | 0.98 |
| W07 | 42 | 1983 | -16.8 | 0.99 |
| W07 | 42 | 1983 | -18.9 | 0.98 |
| W07 | 42 | 1983 | -14.6 | 0.94 |
| Y31 | 42 | 1983 | -14.6 | 0.76 |
| Y31 | 42 | 1983 | 7.7   | 0.85 |
| A47 | 43 | 1982 | 4.4   | 0.86 |
| A47 | 43 | 1982 | 6.6   | 0.87 |
| A59 | 44 | 1980 | 11.8  | 0.81 |
| W16 | 46 | 1979 | -18.1 | 0.93 |
| W16 | 46 | 1979 | -17.2 | 0.99 |
| W16 | 46 | 1979 | -28.6 | 0.93 |
| W16 | 46 | 1979 | -10.8 | 0.92 |

|     |    |      |       |      |
|-----|----|------|-------|------|
| Y22 | 46 | 1979 | -8.4  | 0.81 |
| Y22 | 46 | 1979 | 12.7  | 0.88 |
| Y22 | 46 | 1979 | -7.9  | 0.92 |
| Y22 | 46 | 1979 | -5.4  | 0.76 |
| A52 | 49 | 1976 | -7.5  | 0.90 |
| A52 | 49 | 1976 | -5.8  | 0.94 |
| A42 | 50 | 1975 | -18.1 | 0.96 |
| A42 | 50 | 1975 | -5.7  | 0.89 |
| A42 | 50 | 1975 | -6.9  | 0.90 |
| X03 | 54 | 1971 | 8.6   | 0.82 |
| A43 | 55 | 1969 | 23.1  | 0.90 |
| A43 | 55 | 1969 | -13.9 | 0.94 |
| A43 | 55 | 1969 | 18.0  | 0.92 |
| A43 | 55 | 1969 | -3.3  | 0.79 |
| A69 | 55 | 1970 | -11.1 | 0.96 |
| A69 | 55 | 1970 | -10.7 | 0.97 |
| A69 | 55 | 1970 | -5.5  | 0.82 |
| X11 | 55 | 1969 | -10.0 | 0.73 |
| X11 | 55 | 1969 | -15.3 | 0.96 |
| W69 | 56 | 1969 | -33.2 | 1.00 |
| W69 | 56 | 1969 | -22.3 | 0.99 |
| W69 | 56 | 1969 | -31.9 | 0.99 |
| W69 | 56 | 1969 | -41.9 | 1.00 |
| W71 | 56 | 1969 | -22.1 | 0.95 |
| W71 | 56 | 1969 | -19.4 | 0.81 |
| Y71 | 56 | 1969 | -5.3  | 0.74 |
| Y71 | 56 | 1969 | -11.3 | 0.92 |
| Y71 | 56 | 1969 | 12.2  | 0.84 |
| W58 | 58 | 1967 | -2.6  | 0.88 |
| X12 | 58 | 1967 | -9.2  | 0.74 |
| X12 | 58 | 1967 | -9.8  | 0.97 |
| X12 | 58 | 1967 | -18.4 | 0.98 |
| Y21 | 58 | 1967 | -10.2 | 0.85 |
| Y21 | 58 | 1967 | -3.5  | 0.76 |
| Y20 | 66 | 1959 | -4.1  | 0.74 |
| Y20 | 66 | 1959 | -3.3  | 0.95 |
| Y20 | 66 | 1959 | -2.8  | 0.72 |
| W01 | 67 | 1958 | -10.8 | 0.94 |
| W01 | 67 | 1958 | -4.0  | 0.81 |
| W01 | 67 | 1958 | -10.3 | 0.97 |
| W01 | 67 | 1958 | 11.6  | 0.91 |
| Y16 | 67 | 1958 | 3.7   | 0.87 |
| Y16 | 67 | 1958 | -3.6  | 0.80 |
| Y24 | 73 | 1952 | 6.0   | 0.71 |
| Y24 | 73 | 1952 | -9.4  | 0.94 |
| W05 | 83 | 1942 | -3.6  | 0.82 |

|     |     |      |       |      |
|-----|-----|------|-------|------|
| W05 | 83  | 1942 | -4.1  | 0.80 |
| W03 | 90  | 1935 | -21.5 | 0.99 |
| W03 | 90  | 1935 | -41.3 | 1.00 |
| W03 | 90  | 1935 | -17.4 | 0.98 |
| W03 | 90  | 1935 | -32.2 | 1.00 |
| Y18 | 90  | 1935 | 7.2   | 0.85 |
| Y18 | 90  | 1935 | -10.5 | 0.96 |
| W53 | 121 | 1904 | -3.5  | 0.86 |
| W53 | 121 | 1904 | -7.3  | 0.98 |
| A57 | 125 | 1900 | -25.4 | 0.98 |
| A57 | 125 | 1900 | -36.9 | 1.00 |
| A57 | 125 | 1900 | -26.4 | 0.99 |
| A57 | 125 | 1900 | -23.4 | 0.99 |
| W12 | 128 | 1897 | -32.4 | 1.00 |
| W12 | 128 | 1897 | -13.1 | 0.99 |
| W12 | 128 | 1897 | -39.0 | 0.99 |
| W12 | 128 | 1897 | -20.0 | 0.90 |
| Y27 | 130 | 1895 | -28.0 | 0.87 |
| Y27 | 130 | 1895 | -11.7 | 0.88 |
| Y27 | 130 | 1895 | -22.7 | 0.98 |
| Y27 | 130 | 1895 | -10.3 | 0.99 |
| Y28 | 131 | 1894 | NS    | SN   |
| A65 | 134 | 1891 | -30.1 | 0.99 |
| A65 | 134 | 1891 | -17.3 | 0.97 |
| A65 | 134 | 1891 | 14.3  | 0.86 |
| B23 | 144 | 1881 | -35.4 | 0.99 |
| B23 | 144 | 1881 | -34.5 | 0.98 |
| A41 | 149 | 1875 | -14.8 | 0.87 |
| A41 | 149 | 1875 | -4.1  | 0.72 |
| A41 | 149 | 1875 | -15.2 | 0.97 |
| A41 | 149 | 1875 | -2.9  | 0.65 |
| B21 | 159 | 1866 | -7.5  | 0.73 |
| B21 | 159 | 1866 | -8.9  | 0.86 |
| B21 | 159 | 1866 | -6.5  | 0.88 |
| B17 | 160 | 1865 | -30.8 | 0.95 |
| B17 | 160 | 1865 | -13.5 | 0.97 |
| B17 | 160 | 1865 | -24.8 | 0.89 |
| Y26 | 160 | 1865 | -10.6 | 0.97 |
| Y26 | 160 | 1865 | -31.2 | 0.99 |
| B20 | 163 | 1862 | 7.1   | 0.84 |
| B20 | 163 | 1862 | -4.3  | 0.82 |
| W11 | 163 | 1862 | -11.0 | 0.96 |
| W11 | 163 | 1862 | -9.7  | 0.94 |
| W11 | 163 | 1862 | -8.1  | 0.93 |
| W11 | 163 | 1862 | -9.4  | 0.89 |
| W14 | 166 | 1859 | -75.5 | 1.00 |

|     |     |      |       |      |
|-----|-----|------|-------|------|
| W14 | 166 | 1859 | -26.4 | 1.00 |
| W14 | 166 | 1859 | -42.7 | 1.00 |
| W14 | 166 | 1859 | -33.2 | 1.00 |
| Y29 | 166 | 1859 | -6.0  | 0.96 |
| Y29 | 166 | 1859 | -9.1  | 0.94 |
| A49 | 171 | 1854 | -12.6 | 0.98 |
| A49 | 171 | 1854 | -46.6 | 0.99 |
| A50 | 171 | 1854 | -7.2  | 0.88 |
| A50 | 171 | 1854 | -2.9  | 0.80 |
| A50 | 171 | 1854 | -5.2  | 0.90 |
| A50 | 171 | 1854 | -3.6  | 0.87 |
| W10 | 173 | 1852 | -36.9 | 0.99 |
| W10 | 173 | 1852 | -19.3 | 0.99 |
| W10 | 173 | 1852 | -25.9 | 0.92 |
| W10 | 173 | 1852 | -17.4 | 1.00 |
| A62 | 174 | 1851 | -12.2 | 0.90 |
| A62 | 174 | 1851 | -10.5 | 0.96 |
| Y25 | 174 | 1851 | -15.4 | 0.98 |
| A58 | 175 | 1850 | -30.8 | 1.00 |
| A58 | 175 | 1850 | -29.1 | 1.00 |
| A68 | 175 | 1850 | -15.0 | 0.98 |
| A68 | 175 | 1850 | -4.8  | 0.84 |
| A68 | 175 | 1850 | -11.5 | 0.98 |
| A68 | 175 | 1850 | -6.8  | 0.97 |
| B18 | 175 | 1850 | -20.7 | 0.81 |
| B25 | 175 | 1850 | -27.4 | 0.99 |
| B25 | 175 | 1850 | -30.8 | 0.99 |
| W08 | 175 | 1850 | -23.6 | 0.99 |
| W08 | 175 | 1850 | -11.1 | 0.93 |
| W08 | 175 | 1850 | -7.7  | 0.90 |
| W08 | 175 | 1850 | -4.9  | 0.82 |
| W15 | 175 | 1850 | -80.8 | 0.99 |
| W15 | 175 | 1850 | -57.0 | 0.99 |
| W15 | 175 | 1850 | -30.7 | 0.99 |
| W15 | 175 | 1850 | -34.9 | 0.98 |
| W54 | 175 | 1850 | -9.5  | 0.99 |
| W54 | 175 | 1850 | -6.9  | 0.97 |
| Y23 | 175 | 1850 | -16.8 | 0.99 |
| Y23 | 175 | 1850 | -16.3 | 0.98 |
| Y23 | 175 | 1850 | -18.3 | 0.98 |
| Y30 | 175 | 1850 | -8.7  | 0.91 |
| Y30 | 175 | 1850 | -27.6 | 0.84 |
| Y30 | 175 | 1850 | -29.4 | 0.94 |
| Y30 | 175 | 1850 | -15.0 | 0.97 |
| A70 | 175 | 1850 | NS    | NS   |

Table S2. Overview of soil laboratory data of all locations. The provided soil depth is the sum of all horizons that are taken into account for the organic carbon stock at that particular location. Note: the depth of the C horizon (when sampled for LOI measurement) is always taken as 10 cm, to get an equal contribution of the C horizon, also when the true depth is unknown. NA means no measurements was performed.

| LocationID | Age | pH topsoil | GWC topsoil | total horizons thickness (cm, cumulative) | Organic carbon stock (cumulative, kg m <sup>2</sup> ) |
|------------|-----|------------|-------------|-------------------------------------------|-------------------------------------------------------|
| X08        | 1   | 6.45       | 8.59        | 10                                        | 0.66                                                  |
| W85        | 6   | 6.77       | 27.2        | 11.5                                      | 0.85                                                  |
| X09        | 6   | NA         | NA          | NA                                        | NA                                                    |
| A56        | 8   | 6.24       | 7           | 10                                        | 0.30                                                  |
| W63        | 8   | 4.77       | 27.87       | 10                                        | 1.13                                                  |
| Y63        | 8   | 4.64       | 8.13        | 10                                        | 0.96                                                  |
| A60        | 9   | 5.13       | 9.77        | 10                                        | 0.85                                                  |
| A64        | 10  | 5.93       | 10.35       | 10                                        | 0.99                                                  |
| W83        | 10  | NA         | NA          | NA                                        | NA                                                    |
| A35        | 11  | 6.31       | 9.35        | 10                                        | 0.89                                                  |
| A46        | 11  | 5.11       | 12.07       | 10                                        | 0.52                                                  |
| A48        | 11  | 7.03       | 9.33        | 10                                        | 0.54                                                  |
| A54        | 13  | 5.23       | 39.72       | 12.5                                      | 3.43                                                  |
| A55        | 13  | 5.9        | 11.28       | 10                                        | 0.98                                                  |
| A63        | 13  | 5.33       | 7.1         | 10                                        | 0.93                                                  |
| W04        | 13  | 6.33       | 16.93       | 10                                        | 0.50                                                  |
| Y19        | 13  | 5.65       | 26.81       | 16.3                                      | 1.86                                                  |
| A45        | 15  | NA         | NA          | NA                                        | NA                                                    |
| W60        | 16  | 4.95       | 3.47        | 10                                        | 0.48                                                  |
| X04        | 18  | 5.25       | 39.31       | 10.5                                      | NA                                                    |
| X10        | 21  | 4.92       | 20.97       | 12.25                                     | 1.35                                                  |
| A31        | 22  | 6.19       | 9.14        | 10                                        | 0.80                                                  |
| A36        | 25  | 6.33       | 5.66        | 10                                        | 0.66                                                  |
| B15        | 30  | 5.46       | 17.82       | 7.6                                       | 1.63                                                  |
| W07        | 42  | 5.35       | 5.33        | 11.2                                      | 1.55                                                  |
| Y31        | 42  | 5.94       | 31.72       | 17.6                                      | 1.55                                                  |
| A47        | 43  | NA         | NA          | NA                                        | NA                                                    |
| A59        | 44  | 4.8        | 30.09       | 17.8                                      | 3.86                                                  |
| W16        | 46  | 5.92       | 34.36       | 10                                        | 1.41                                                  |
| Y22        | 46  | 5.94       | 2.66        | 11.2                                      | 1.48                                                  |
| A52        | 49  | 5.14       | 9.57        | 10                                        | 0.89                                                  |

|     |     |      |        |       |        |
|-----|-----|------|--------|-------|--------|
| A42 | 50  | 4.36 | 27.06  | 11.2  | 1.33   |
| X03 | 54  | 4.93 | 19.93  | 11.2  | 1.00   |
| A43 | 55  | 6.38 | 11.57  | 10    | 1.02   |
| A69 | 55  | 4.93 | 16.56  | 2     | 0.50   |
| X11 | 55  | 5.81 | 12.22  | 10.1  | 2.99   |
| W69 | 56  | 5.24 | 159.39 | 2     | 2.20   |
| W71 | 56  | 5.63 | 19.87  | 1     | 0.07   |
| Y71 | 56  | 4.69 | 33.24  | 11    | 1.80   |
| W58 | 58  | 5.1  | 300.25 | 10.5  | 3.81   |
| X12 | 58  | 5.46 | 86.66  | 18    | 2.20   |
| Y21 | 58  | 5.05 | 119.05 | 11    | 7.88   |
| Y20 | 66  | 4.16 | 19.22  | 5.1   | 4.75   |
| W01 | 67  | 5.48 | 21.77  | 12    | 0.55   |
| Y16 | 67  | 4.8  | 22.89  | 12    | 1.17   |
| Y24 | 73  | 4.85 | 10.76  | 10    | 0.89   |
| W05 | 83  | 5.91 | 31.72  | 10    | 1.81   |
| W03 | 90  | 4.43 | 43.87  | 12    | 1.85   |
| Y18 | 90  | 4.49 | 30.59  | 11    | 1.39   |
| W53 | 121 | NA   | NA     | NA    | NA     |
| A57 | 125 | NA   | 200.6  | 19.5  | 34.73  |
| W12 | 128 | NA   | 1545.2 | 15.2  | 113.41 |
| Y27 | 130 | 4.51 | 151.05 | 11.2  | 7.83   |
| Y28 | 131 | 3.86 | 51.71  | 12    | 3.13   |
| A65 | 134 | 5.9  | 11.64  | 15.2  | 4.91   |
| B23 | 144 | 4.56 | 43.59  | 14    | 12.18  |
| A41 | 149 | 4.36 | 23.66  | 10.1  | 4.67   |
| B21 | 159 | 4.33 | 155.13 | 12.5  | 13.67  |
| B17 | 160 | 5.48 | 44.02  | 10    | NA     |
| Y26 | 160 | 4.51 | 61.97  | 10.75 | 1.51   |
| B20 | 163 | 5.26 | 114.19 | 10.1  | 23.21  |
| W11 | 163 | 5.91 | 78.15  | 5     | 3.30   |
| W14 | 166 | 4.78 | 429.47 | 20.1  | 59.24  |
| Y29 | 166 | 4.84 | 53.42  | 17.6  | 6.95   |
| A49 | 171 | 4.72 | 69.7   | 3.5   | 5.50   |
| A50 | 171 | 4.67 | 66.75  | 17.6  | 18.86  |
| W10 | 173 | 4.79 | 234.33 | 8     | 17.53  |
| A62 | 174 | 4.22 | 19     | 13    | 1.93   |
| Y25 | 174 | 3.99 | 60.43  | 13    | 5.88   |
| A58 | 175 | 4.52 | 104.62 | 14    | 16.09  |
| A68 | 175 | 3.89 | 82.13  | 20.3  | 8.54   |
| B18 | 175 | 4.73 | 55.33  | 17    | 5.92   |
| B25 | 175 | 4.14 | 12.83  | 5     | 1.09   |
| W08 | 175 | 4.67 | 24.24  | 17.6  | 80.83  |
| W15 | 175 | 5.11 | 687.66 | 18.9  | 70.48  |
| W54 | 175 | 4.61 | 27.66  | 10    | 1.83   |
| Y23 | 175 | 4.28 | 157.39 | 15.1  | 20.73  |

|     |     |      |       |      |      |
|-----|-----|------|-------|------|------|
| Y30 | 175 | 4.38 | 64.97 | 22.8 | 7.67 |
| A70 | 175 | 4.3  | 24.04 | 12   | 2.02 |
